# Supplementary material for: Bioactivities of a New Pyrrolidine Alkaloid from the Root Barks of Orixa japonica
Source: PubMed Central journal article supplement (PMC6273699; doi:10.3390/molecules21121665), 2016-12-02
Supplement: molecules-21-01665-s001.pdf [file molecules-21-01665-s001.pdf]

## Supplementary Materials: Bioactivities of a New Pyrrolidine Alkaloid from the Root Barks of *Orixa japonica*

Xin Chao Liu, Daowan Lai, Qi Zhi Liu, Ligang Zhou, Qiyong Liu and Zhi Long Liu

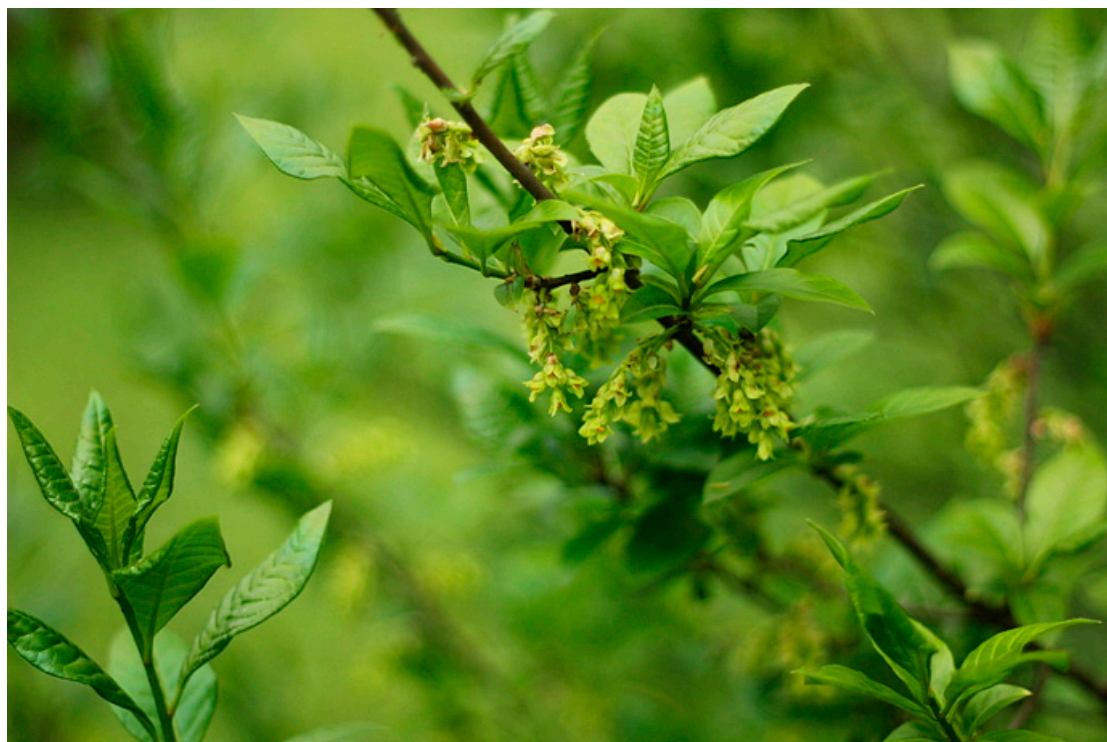

Figure S1. Picture of *Orixa japonica*.

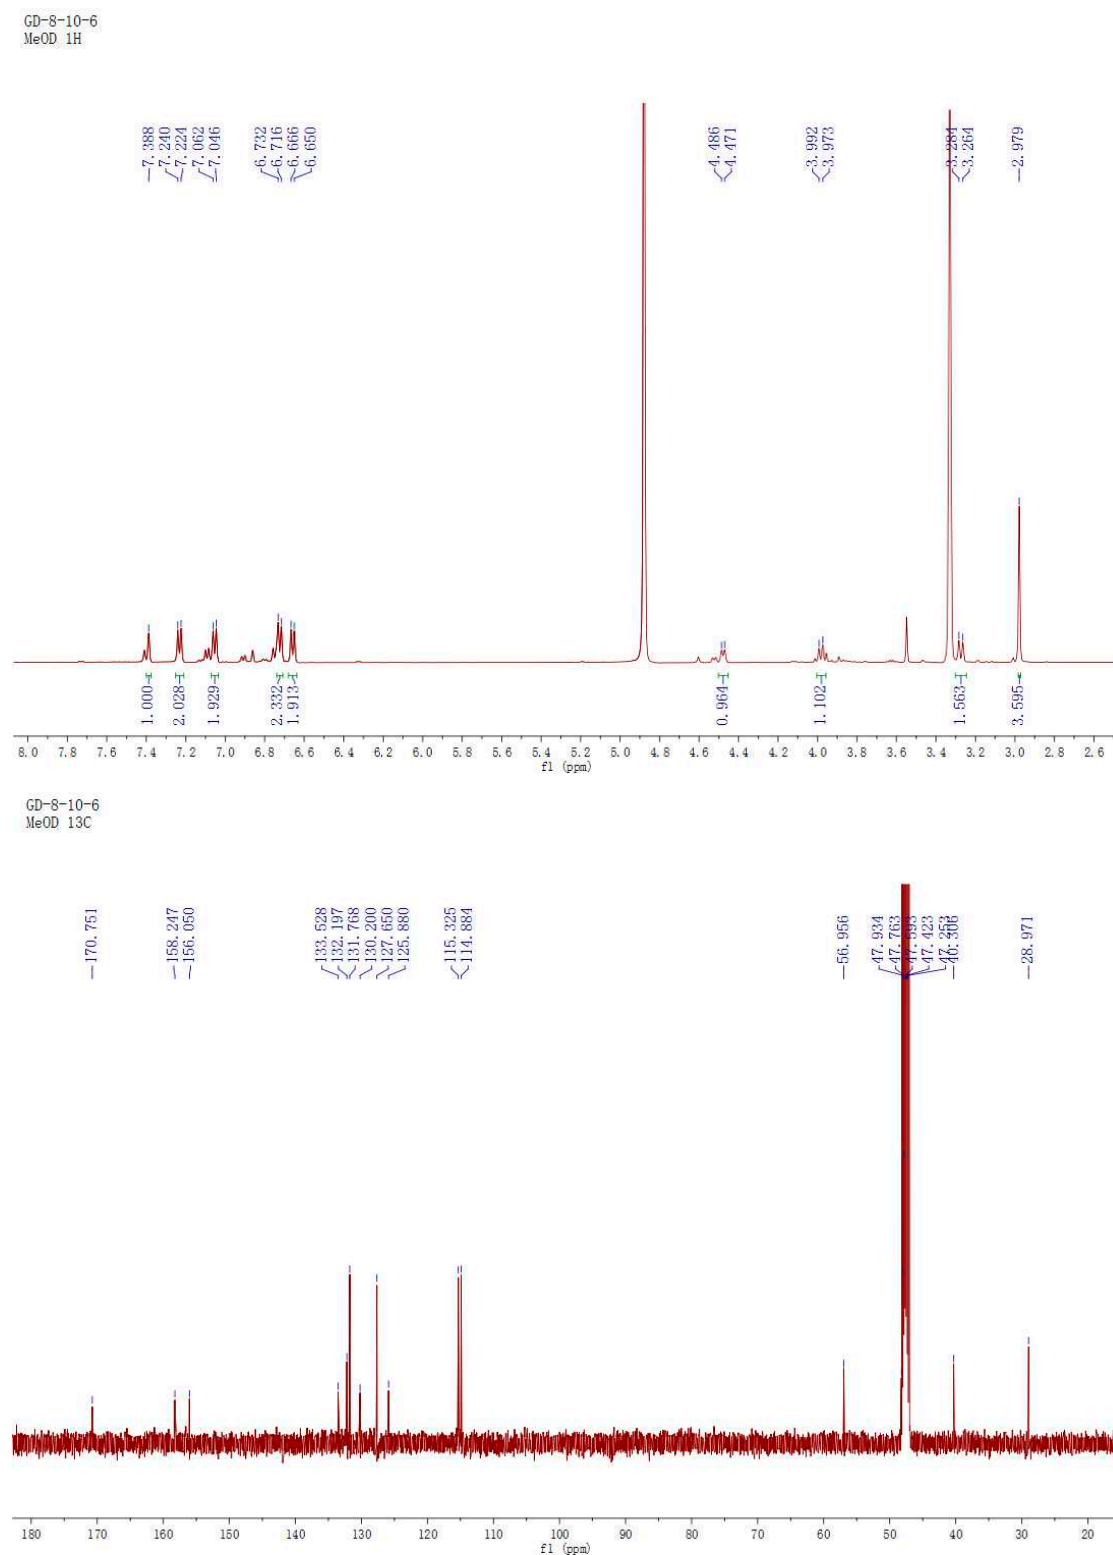

**Figure S2.**  $^1\text{H}$ - and  $^{13}\text{C}$ -NMR spectra of (Z)-3-(4-hydroxybenzylidene)-4-(4-hydroxyphenyl)-1-methylpyrrolidin-2-one.

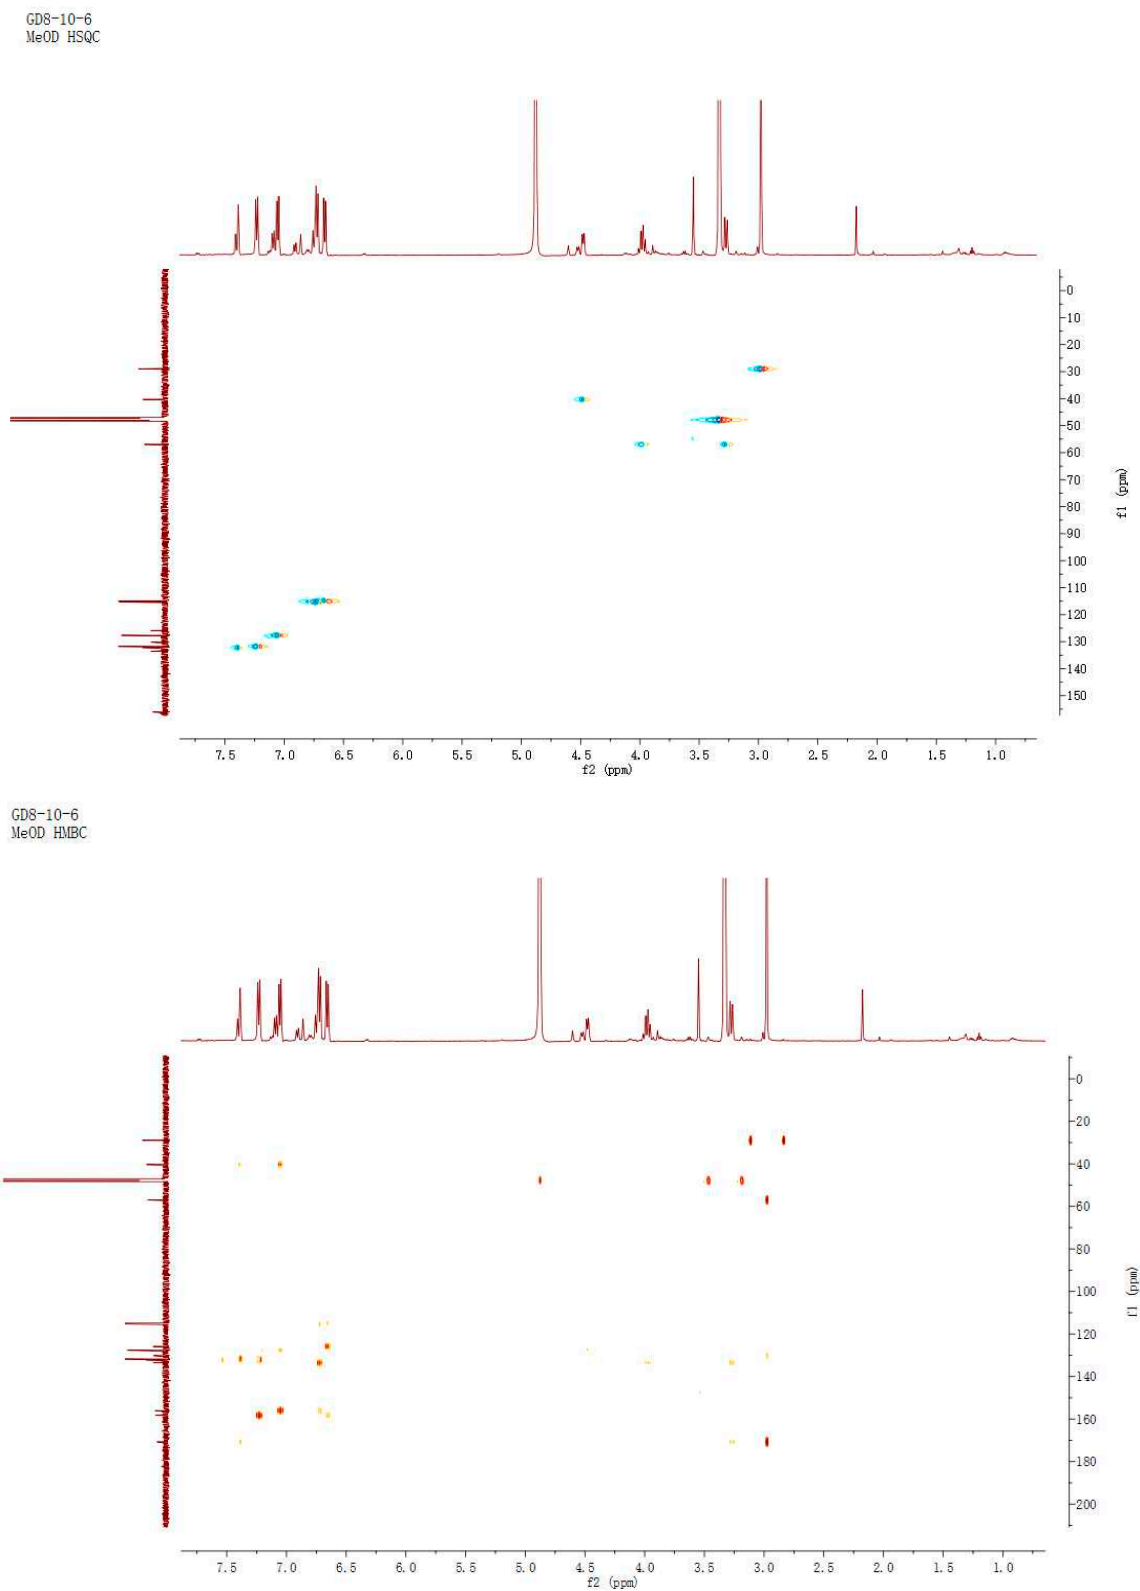

**Figure S3.** HSQC- and HMBC-NMR spectra of (Z)-3-(4-hydroxybenzylidene)-4-(4-hydroxyphenyl)-1-methylpyrrolidin-2-one.

## ESI(N),8-10-6,20151225

Analysis Info Acquisition Date 12/25/2015 10:22:23 AM  
 Analysis Name D:\Data\ESI\2015\2015-12\1225\8-10-6\_000001.d  
 Sample Name 8-10-6 Instrument solariX

Acquisition Parameter  
 Acquisition Mode Single MS Acquired Scans 10 Calibration Date Tue Nov 3 11:14:33 2015  
 Polarity Negative No. of Cell Fills 1 Data Acquisition Size 1048576  
 Broadband Low Mass 57.7 m/z Source Accumulation 0.001 sec Data Processing Size 2097152  
 Broadband High Mass 1000.0 m/z Ion Accumulation Time 0.100 sec Apodization Sine-Bell Multiplication

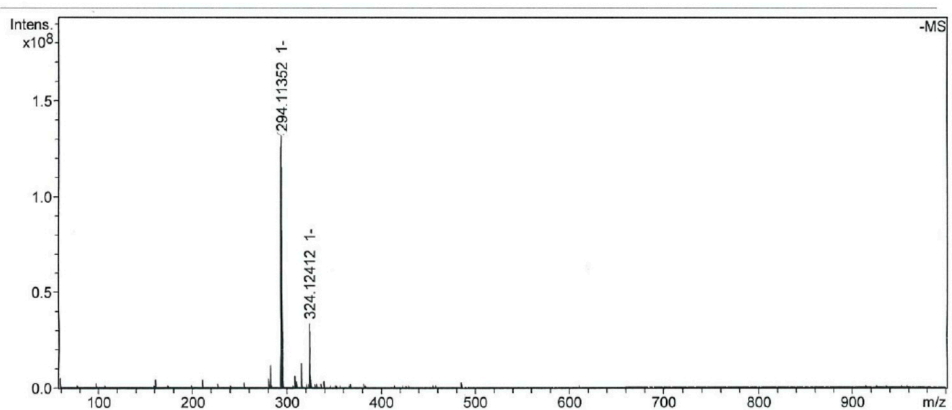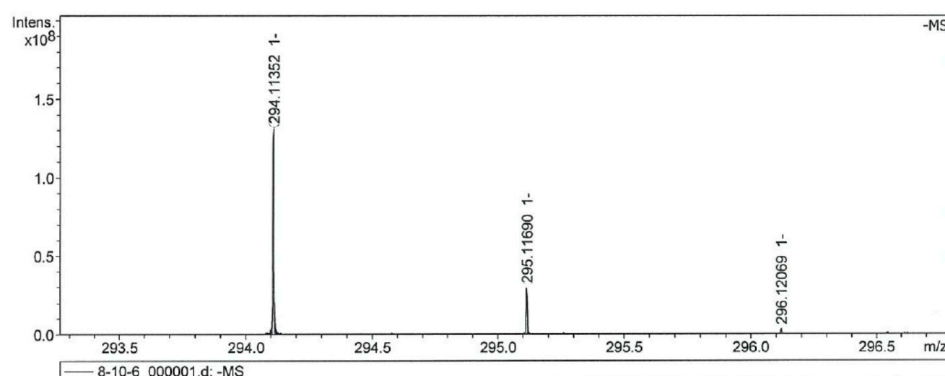

| Meas. m/z  | # | Ion Formula                                     | Score  | m/z        | err [ppm] | Mean err [ppm] | mSigma | rdb  | e <sup>-</sup> Conf | N-Rule |
|------------|---|-------------------------------------------------|--------|------------|-----------|----------------|--------|------|---------------------|--------|
| 294.113522 | 1 | C <sub>18</sub> H <sub>16</sub> NO <sub>3</sub> | 100.00 | 294.113567 | 0.2       | 0.0            | 13.6   | 11.5 | even                | ok     |

Figure S4. HRESIMS spectra of (Z)-3-(4-hydroxybenzylidene)-4-(4-hydroxyphenyl)-1-methylpyrrolidin-2-one.
